# Supplementary material for: Improved Framework for Tractography Reconstruction of the Optic Radiation
Source: PubMed Central journal article supplement (PMC4573981; doi:10.1371/journal.pone.0137064), 2015-09-16
Supplement: pone.0137064.s002.pdf [file pone.0137064.s002.pdf]

|                                               |    | OR-TCT<br>(iFOD2)    |                      | OR-TCT<br>(iFOD2 + AEC) |                      | reference mask <sup>a</sup> |
|-----------------------------------------------|----|----------------------|----------------------|-------------------------|----------------------|-----------------------------|
|                                               |    | HARDI A <sup>b</sup> | HARDI B <sup>c</sup> | HARDI A <sup>b</sup>    | HARDI B <sup>c</sup> | Histological                |
| Tract volume ( $cm^3$ ),<br>mean ( $\pm SD$ ) | lh | 45.83 ( $\pm 5.41$ ) | 48.13 ( $\pm 7.83$ ) | 10.00 ( $\pm 2.42$ )    | 13.60 ( $\pm 0.81$ ) | 18.4 ( $\pm 2.1$ )          |
|                                               | rh | 41.69 ( $\pm 3.68$ ) | 42.99 ( $\pm 9.53$ ) | 9.39 ( $\pm 1.91$ )     | 13.26 ( $\pm 1.53$ ) | 18.4 ( $\pm 1.3$ )          |
| Sensitivity                                   | lh | 0.98                 | 0.98                 | 0.66                    | 0.60                 | -                           |
|                                               | rh | 0.98                 | 0.98                 | 0.56                    | 0.57                 | -                           |
| Precision                                     | lh | 0.21                 | 0.20                 | 0.62                    | 0.54                 | -                           |
|                                               | rh | 0.24                 | 0.22                 | 0.60                    | 0.57                 | -                           |
| Specificity                                   | lh | 0.94                 | 0.93                 | 0.99                    | 0.99                 | -                           |
|                                               | rh | 0.94                 | 0.94                 | 0.99                    | 0.99                 | -                           |
| F-measure                                     | lh | 0.35                 | 0.33                 | 0.64                    | 0.57                 | -                           |
|                                               | rh | 0.38                 | 0.35                 | 0.58                    | 0.55                 | -                           |

<sup>a</sup>Volumes in the histological reference mask were obtained from Clatworthy et al., 2010.

<sup>b</sup>HARDI A: 1.5 mm isotropic voxel size; b-value, 1500  $s/mm^2$

<sup>c</sup>HARDI B: 2.5 mm isotropic voxel size; b-value, 1000  $s/mm^2$

Abbreviations:

AEC: automatic post-processing based on anatomical exclusion criteria.

iFOD: high order integration over fiber orientation distributions.

lh: left hemisphere.

OR-TCT: optic radiation tractography-constructed template.

rh: right hemisphere.
