# Supplementary material for: Improved Framework for Tractography Reconstruction of the Optic Radiation
Source: PubMed Central journal article supplement (PMC4573981; doi:10.1371/journal.pone.0137064), 2015-09-16
Supplement: pone.0137064.s003.pdf [file pone.0137064.s003.pdf]

|                    |    | OR-TCT (iFOD2)       |                      | OR-TCT (iFOD2 + AEC) |                      |
|--------------------|----|----------------------|----------------------|----------------------|----------------------|
|                    |    | HARDI A <sup>a</sup> | HARDI B <sup>b</sup> | HARDI A <sup>a</sup> | HARDI B <sup>b</sup> |
| False positive (%) | lh | 82.22                | 85.57                | 16.69                | 28.95                |
|                    | rh | 80.13                | 82.70                | 17.21                | 21.22                |
| False negative (%) | lh | 0.11                 | 0.11                 | 34.25                | 16.64                |
|                    | rh | 0.12                 | 0.08                 | 44.51                | 33.19                |

<sup>a</sup>HARDI A: 1.5 mm isotropic voxel size; b-value, 1500 s/mm<sup>2</sup>

<sup>b</sup>HARDI B: 2.5 mm isotropic voxel size; b-value, 1000 s/mm<sup>2</sup>

Abbreviations:

AEC: automatic post-processing based on anatomical exclusion criteria.

iFOD: high order integration over fiber orientation distributions.

lh: left hemisphere.

OR-TCT: optic radiation tractography-constructed template.

rh: right hemisphere.
