# Supplementary material for: Improved Framework for Tractography Reconstruction of the Optic Radiation
Source: PubMed Central journal article supplement (PMC4573981; doi:10.1371/journal.pone.0137064), 2015-09-16
Supplement: pone.0137064.s004.pdf [file pone.0137064.s004.pdf]

|                                        | FP                | TP    | FN             | TN      | VOL   | SENS | PREC | SPEC | F-MEASURE |
|----------------------------------------|-------------------|-------|----------------|---------|-------|------|------|------|-----------|
| OR-TCT + AEC<br>without threshold (lh) | 55479<br>(66.72%) | 27667 | 2461<br>(2.9%) | 1737370 | 83146 | 0.92 | 0.33 | 0.97 | 0.49      |
| OR-TCT + AEC<br>without threshold (rh) | 50823<br>(63.76%) | 28881 | 2780<br>(3.5%) | 1740493 | 79704 | 0.91 | 0.36 | 0.97 | 0.52      |
| OR-TCT + AEC<br>1% threshold (lh)      | 4278<br>(16.7%)   | 21350 | 8778<br>(34%)  | 1805218 | 25628 | 0.71 | 0.83 | 1    | 0.77      |
| OR-TCT + AEC<br>1% threshold (rh)      | 4279<br>(17.2%)   | 20591 | 11070<br>(44%) | 1803684 | 24870 | 0.65 | 0.83 | 1    | 0.73      |

Number of voxels and percentage (%) are shown.

Abbreviations:

AEC: automatic post-processing based on anatomical exclusion criteria.

FN: False negatives.

FP: False positives.

lh: left hemisphere.

OR-TCT: optic radiation tractography-constructed template.

rh: right hemisphere.

TN: True negatives.

TP: True positives.
